# Supplementary material
Source: Research Square preprint supplement (doi:10.21203/rs.3.rs-9055250/v1)
Supplement: Supplementary file 1 [file 6cde59288a54810538d18f9b.docx]

[Table 2] MATLAB Functions used in the file folder ‘func’

| Functions | Purposes |
| --- | --- |
| aggreateConfusionMetric | Merge confusion matrices into an aggregated classification result matrix. |
| augmentPointCloud | Apply data augmentation to the training dataset. |
| batchData | Convert point cloud data and labels into deep learning framework-compatible format and transfer to GPU memory. |
| dataPrep | Split training and testing data from the same source file. |
| dataTransform | Implement a point cloud transformation network to predict and apply transformation matrix T to input data dlX through sequential point cloud operations. |
| dlconv2 | Integrate MATLAB built-in convolution functions into deep learning modules for neural network operations. |
| dlfeval2 | Evaluate deep learning functions with automatic differentiation-enabled gradient computation. |
| evaluateClassificationMetrics | Calculate and display classification performance metrics: Precision, Recall, F1-score and Specificity. |
| func_grouplayers | Implement grouped layers for feature map segmentation in neural networks. |
| func_MSGs | Implement MSG layers in PointNet++ with multi-scale grouping where hierarchical point features are adaptively fused. |
| func_samples_layers | Implement sampling layers in PointNet++ with farthest point sampling (FPS) for hierarchical downsampling. |
| initializeClassificationMLP | Initialize a multi-layer perceptron (MLP) for classification tasks with parameter configuration optimized for label prediction. |
| initializeSharedMLP | Initialize a shared multi-layer perceptron (MLP) for parameter reuse across neural network modules. |
| initializeTrainingProgressPlot | Initialize a training progress plot for real-time monitoring of model convergence metrics. |
| initializeTransform | Initialize a transformation network with parameter initialization for geometric feature learning. |
| initializeWeightsGaussian | Initialize Gaussian-distributed random weights for neural network parameter initialization. |
| initializeWeightsHes | Initialize neural network weights. |
| modelGradients | Execute model function for forward computation and output generation. |
| oneHotEncode | Apply one-hot encoding to categorical variables where each category is uniquely represented by a binary vector. |
| perceptron | Implement convolution, Batch Normalization, and ReLU activation layers in a unified function. |
| pointnetClassifier | Augment point cloud data dimensions with additional feature channels for enhanced classification performance in PointNet++. |
| pointnetEncoder | Apply input transformation to point cloud data where spatial coordinates are aligned through a spatial transformer network (STN). |
| prepareForPrediction | Preprocess input data prior to prediction with standardization, normalization, and other required transformations. |
| preprocessPointCloud | Normalize (x, y, z) coordinates of point cloud data to the [0, 1] range for preprocessing. |
| PtCloudClassificationDatastore | Organize point cloud data with corresponding category labels from specified folders for machine/deep learning tasks. |
| randReplicateFiles | Shuffle indices for random permutation of ordered data sequences. |
| selectPoints | Resample input point cloud data to the specified number of points *numPoints* through downsampling or upsampling operations. |
| selectPoints2 | Resample input point cloud data to the specified *numPoints* and output the standardized point cloud. |
| sharedMLP | Implement a shared MLP to construct deep neural network forward propagation by sequentially applying convolution, Batch Normalization, and ReLU activation operations to input data *dlX*. |
