# Supplementary material
Source: Research Square preprint supplement (doi:10.21203/rs.3.rs-9055250/v1)
Supplement: Supplementary file 2 [file 9d72d6745e2bd80b37796d62.docx]

[Table 4] External test results of the classification model

| Parameter |  | Dataset 1 | | Dataset 2 | | |
| --- | --- | --- | --- | --- | --- | --- |
| Active | Inactive | Chair | Display | Microwave |
| Input dimension |  | 4D | | 3D | | |
| Accuracy |  | 0.8333 | | 0.8889 | | |
| Precision |  | 0.85714 | 0.8125 | 0.80 | 0.92683 | 1 |
| Recall |  | 0.80 | 0.86667 | 0.93333 | 0.95 | 0.70 |
| F1_score |  | 0.82759 | 0.83871 | 0.86154 | 0.93827 | 0.82353 |
| Specificity |  | 0.86667 | 0.80 | 0.88333 | 0.94 | 1 |
