# Supplementary material
Source: Research Square preprint supplement (doi:10.21203/rs.3.rs-9055250/v1)
Supplement: Supplementary file 3 [file c5a9d386e07100b431abb438.docx]

[Table 1] MATLAB Functions and scripts used in the file folder ‘Files01’

| Functions | Purposes | Scripts | Purposes |
| --- | --- | --- | --- |
| d3tom4 | Transform a 3D MATLAB array data into an *n*×4 matrix, where *n* is the number of points in a point cloud. | example01 | Transform a MATLAB 3D array data to a point cloud data (*.ply) with the same name. |
|  |  | example02 | Transform a 4-column *.txt data to a point cloud data (*.ply). |
