# Supplementary material
Source: Research Square preprint supplement (doi:10.21203/rs.3.rs-9055250/v1)
Supplement: Supplementary file 4 [file f3907554f5a354eb3e3008c1.docx]

[Table 3] Evaluation results of the classification model

| Parameter |  | Dataset 1 | | Dataset 2 | | |
| --- | --- | --- | --- | --- | --- | --- |
| Active | Inactive | Chair | Display | Microwave |
| Input dimension |  | 4D | | 3D | | |
| Accuracy |  | 0.85 | | 0.8917 | | |
| Precision |  | 0.88889 | 0.81818 | 0.78 | 0.95238 | 1 |
| Recall |  | 0.80 | 0.90 | 0.975 | 1 | 0.70 |
| F1_score |  | 0.84211 | 0.85714 | 0.86667 | 0.97561 | 0.82353 |
| Specificity |  | 0.90 | 0.80 | 0.8625 | 0.975 | 1 |
